# Supplementary material for: Metal complexes of tosyl sulfonamides: design, X-ray structure, biological activities and molecular docking studies
Source: Royal Society of Chemistry journal article supplement (doi:10.1039/c4ra16124f), 2015-01-01
Supplement: c4ra16124f1.pdf [file c4ra16124f1.pdf]

**Metal Complexes of Tosyl Sulfonamides: Design, X-ray Structure, Biological Activities and  
Molecular Docking Studies**

Najm Ul Hassan Khan<sup>1</sup>, Sumera Zaib<sup>2,3\*</sup>, Kishwar Sultana<sup>4</sup>, Imtiaz Khan<sup>5</sup>, Berline Mougang-  
Soume<sup>6</sup>, Humaira Nadeem<sup>1</sup> and Mukhtiar Hassan<sup>2</sup>

<sup>1</sup>*Riphah Institute of Pharmaceutical Sciences, Riphah International University Islamabad-44000  
Pakistan*

<sup>2</sup>*Department of Biochemistry, Hazara University, Garden Campus, Mansehra, 21300, Pakistan*

<sup>3</sup>*Centre for Advanced Drug Research, COMSATS Institute of Information Technology,  
Abbottabad-22060, Pakistan*

<sup>4</sup>*Margalla College of Pharmacy, MIHS, Rawalpindi-Pakistan*

<sup>5</sup>*School of Chemistry, University of Nottingham, University Park, Nottingham, NG7 2RD (UK)*

<sup>6</sup>*Department of Chemistry, Université de Montréal, Montréal, Québec, Canada*

**To whom Correspondence should address:**

Sumera Zaib

Department of Biochemistry, Hazara University, Garden Campus, Mansehra, 21300, Pakistan.

Tel.: +92 997 414137: Fax: +92 997 530046. E-mail address: [sumera.biochem@gmail.com](mailto:sumera.biochem@gmail.com)

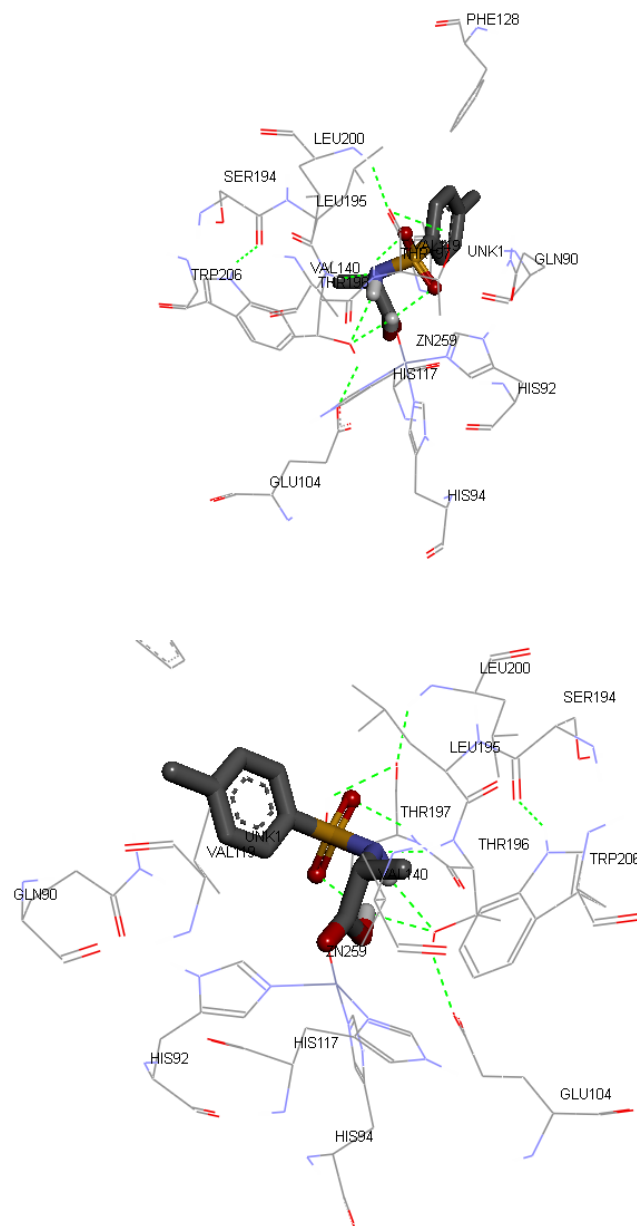

**Figure S1.** Binding site interactions of compound NA1.

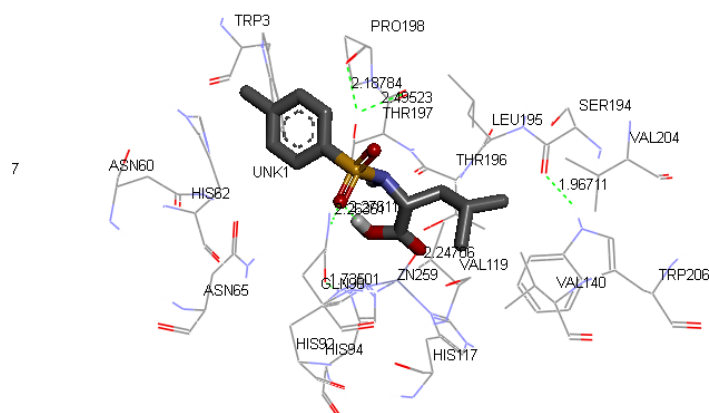

**Figure S2.** Binding site interactions of compound NA2.

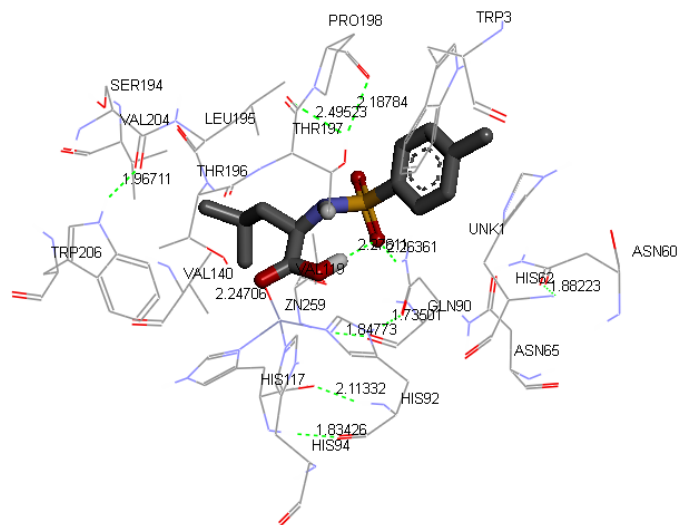

**Figure S3.** Binding site interactions of compound NA3.

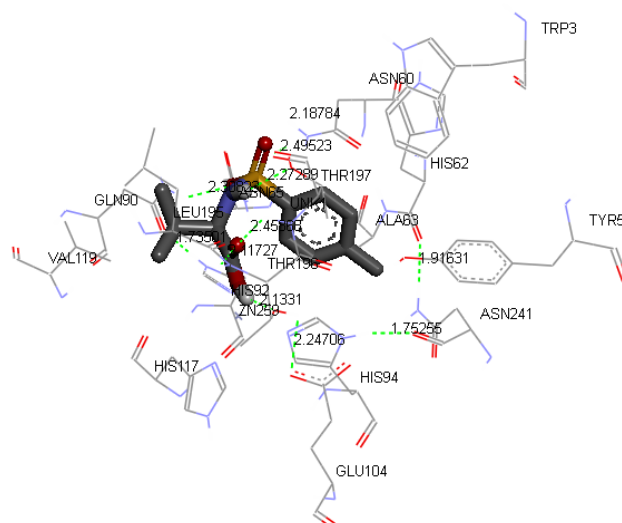

**Figure S4.** Binding site interactions of compound NA4.

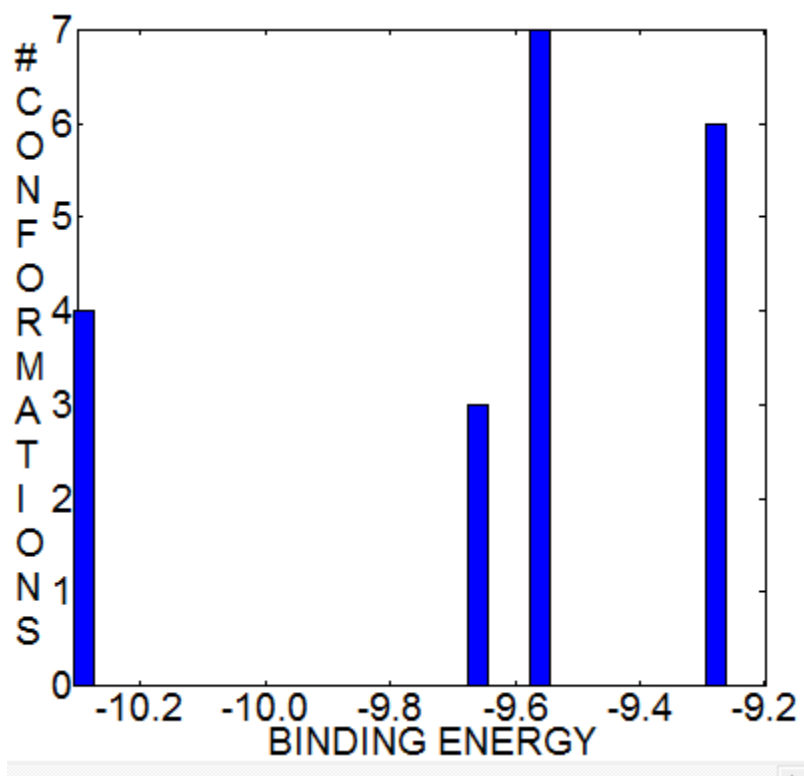

Figure S5. Clustering histogram of compound NA1.

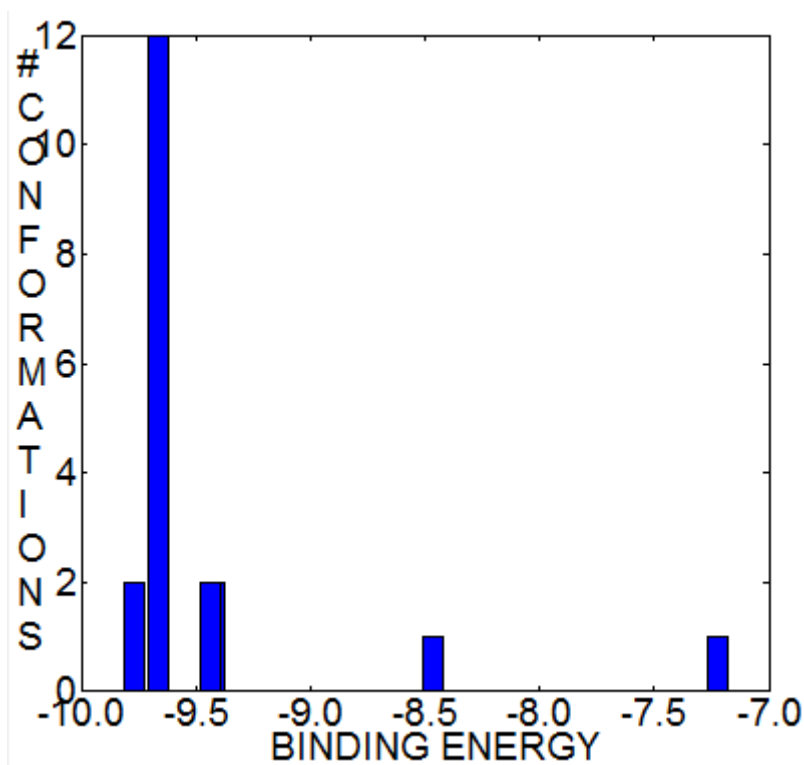

Figure S6. Clustering histogram of compound NA2.

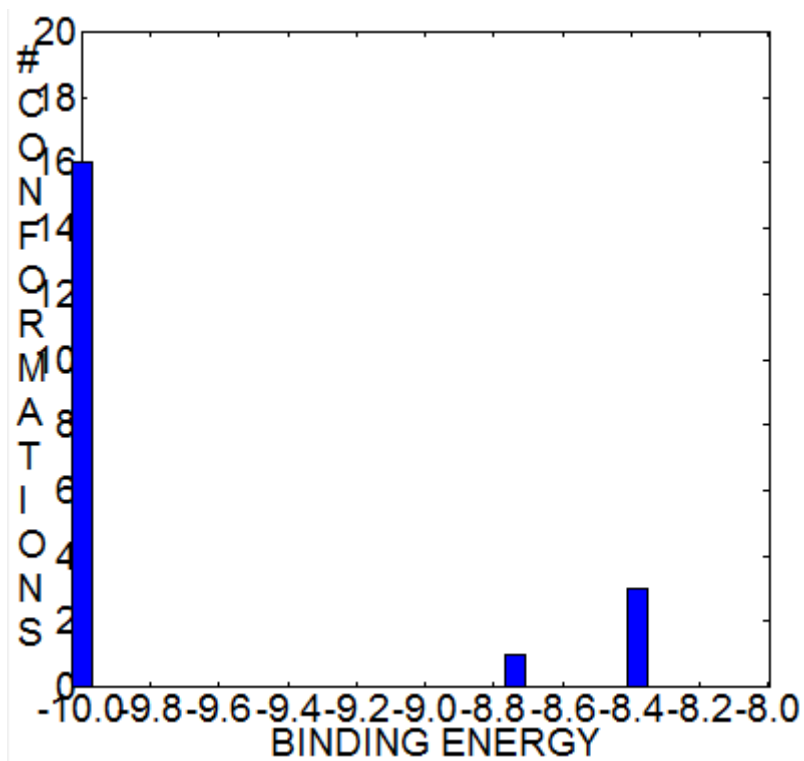

Figure S7. Clustering histogram of compound NA3.



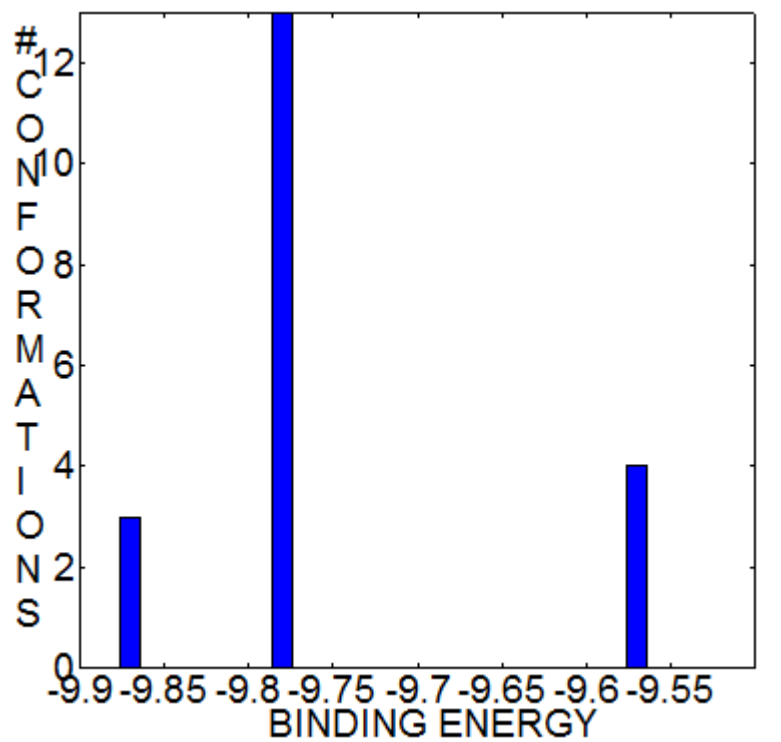

**Figure S8.** Clustering histogram of compound NA4.

**Table S1** Crystal Data Collection and Refinement Parameters for compound NA3

| Parameters                                     | Compound (NA3)                                    |
|------------------------------------------------|---------------------------------------------------|
| Chemical formula                               | C <sub>13</sub> H <sub>19</sub> NO <sub>4</sub> S |
| Crystal colour                                 | Yellow                                            |
| Fw; F (000)                                    | 285.35; 608                                       |
| Temperature/K                                  | 100(2)                                            |
| wavelength (Å)                                 | 0.71073                                           |
| a/Å                                            | 5.51320(10)                                       |
| b/Å                                            | 11.8110(2)                                        |
| c/Å                                            | 21.7712(3)                                        |
| α /°                                           | 90.00                                             |
| β /°                                           | 90.00                                             |
| γ /°                                           | 90.00                                             |
| Volume/Å <sup>3</sup>                          | 1417.66(4)                                        |
| ρ <sub>calcd</sub> mg/mm <sup>3</sup>          | 1.337                                             |
| μ (mm <sup>-1</sup> )                          | 2.127                                             |
| θ range (deg); completeness                    | 4.06 – 70.98; 0.996                               |
| collected reflections; R <sub>σ</sub>          | 18602; 0.0181                                     |
| unique reflections; R <sub>int</sub>           | 18602; 0.0253                                     |
| R1 <sup>a</sup> ; wR2 <sup>b</sup> [I > 2σ(I)] | 0.0314; 0.0837                                    |
| R1; wR2 [all data]                             | 0.0320; 0.0841                                    |
| Goodness-of-fit on F <sup>2</sup>              | 1.042                                             |
| largest diff peak and hole                     | 0.370 and -0.403                                  |

$$^a R1 = \frac{\sum(|F_o| - |F_c|)}{\sum|F_o|}$$

$$^b wR2 = \left\{ \frac{\sum[w(F_o2 - F_c2)^2]}{\sum[w(F_o2)^2]} \right\}^{1/2}$$

**Table S2** Selected bond lengths (Å) for compound NA3

**Supporting Information**

|        |            |          |          |
|--------|------------|----------|----------|
| S1-O2  | 1.4252(14) | C5-H5C   | 0.9800   |
| S1-O1  | 1.4344(13) | C6-C7    | 1.386(3) |
| S1-N1  | 1.6343(14) | C6-H6    | 0.9500   |
| S1-C1  | 1.7736(18) | C7-H7    | 0.9500   |
| O3-C9  | 1.209(2)   | C8-C9    | 1.520(2) |
| O4-C9  | 1.323(2)   | C8-C10   | 1.556(2) |
| O4-H4  | 0.8400     | C8-H8    | 1.0000   |
| N1-C8  | 1.452(2)   | C10-C12  | 1.531(2) |
| N1-H1A | 0.8800     | C10-C11  | 1.547(3) |
| C1-C7  | 1.384(3)   | C10-H10  | 1.0000   |
| C1-C2  | 1.393(3)   | C11-H11A | 0.9800   |
| C2-C3  | 1.388(3)   | C11-H11B | 0.9800   |
| C2-H2  | 0.9500     | C11-H11C | 0.9800   |
| C3-C4  | 1.392(3)   | C12-C13  | 1.518(3) |
| C3-H3  | 0.9500     | C12-H12A | 0.9900   |
| C4-C6  | 1.392(3)   | C12-H12B | 0.9900   |
| C4-C5  | 1.512(3)   | C13-H13A | 0.9800   |
| C5-H5A | 0.9800     | C13-H13B | 0.9800   |
| C5-H5B | 0.9800     | C13-H13C | 0.9800   |

**Table S3** Selected bond angles (°) for compound **NA3**

|           |            |               |            |
|-----------|------------|---------------|------------|
| O2-S1-O1  | 120.61(8)  | C6-C7-H7      | 120.4      |
| O2-S1-N1  | 107.97(8)  | N1-C8-C9      | 110.95(14) |
| O1-S1-N1  | 104.60(8)  | N1-C8-C10     | 110.73(14) |
| O2-S1-C1  | 107.83(9)  | C9-C8-C10     | 109.34(14) |
| O1-S1-C1  | 107.96(8)  | N1-C8-H8      | 108.6      |
| N1-S1-C1  | 107.17(8)  | C9-C8-H8      | 108.6      |
| C9-O4-H4  | 109.5      | C10-C8-H8     | 108.6      |
| C8-N1-S1  | 119.78(12) | O3-C9-O4      | 124.60(16) |
| C8-N1-H1A | 120.1      | O3-C9-C8      | 122.97(17) |
| S1-N1-H1A | 120.1      | O4-C9-C8      | 112.40(14) |
| C7-C1-C2  | 120.82(17) | C12-C10-C11   | 110.46(16) |
| C7-C1-S1  | 119.88(14) | C12-C10-C8    | 110.63(15) |
| C2-C1-S1  | 119.25(14) | C11-C10-C8    | 111.32(15) |
| C3-C2-C1  | 119.20(17) | C12-C10-H10   | 108.1      |
| C3-C2-H2  | 120.4      | C11-C10-H10   | 108.1      |
| C1-C2-H2  | 120.4      | C8-C10-H10    | 108.1      |
| C2-C3-C4  | 120.93(18) | C10-C11-H11A  | 109.5      |
| C2-C3-H3  | 119.5      | C10-C11-H11B  | 109.5      |
| C4-C3-H3  | 119.5      | H11A-C11-H11B | 109.5      |

**Supporting Information**

|            |            |               |            |
|------------|------------|---------------|------------|
| C6-C4-C3   | 118.58(18) | C10-C11-H11C  | 109.5      |
| C6-C4-C5   | 120.62(18) | H11A-C11-H11C | 109.5      |
| C3-C4-C5   | 120.78(19) | H11B-C11-H11C | 109.5      |
| C4-C5-H5A  | 109.5      | C13-C12-C10   | 113.32(16) |
| C4-C5-H5B  | 109.5      | C13-C12-H12A  | 108.9      |
| H5A-C5-H5B | 109.5      | C10-C12-H12A  | 108.9      |
| C4-C5-H5C  | 109.5      | C13-C12-H12B  | 108.9      |
| H5A-C5-H5C | 109.5      | C10-C12-H12B  | 108.9      |
| H5B-C5-H5C | 109.5      | H12A-C12-H12B | 107.7      |
| C7-C6-C4   | 121.32(18) | C12-C13-H13A  | 109.5      |
| C7-C6-H6   | 119.3      | C12-C13-H13B  | 109.5      |
| C4-C6-H6   | 119.3      | H13A-C13-H13B | 109.5      |
| C1-C7-C6   | 119.14(17) | C12-C13-H13C  | 109.5      |
| C1-C7-H7   | 120.4      | H13A-C13-H13C | 109.5      |
|            |            | H13B-C13-H13C | 109.5      |
